# Supplementary material for: Changes in the Texture and Flavor of Lotus Root after Different Cooking Methods
Source: MDPI journal article supplement (doi:10.3390/foods12102012), 2023-05-16
Supplement: s1 [file s1]

**Table S1.** Scheme of elution gradient for HPLC - DAD analysis.

| Time (min) | Solvent (A %) | Solvent (B %) |
|------------|---------------|---------------|
| 0          | 10            | 90            |
| 10         | 18            | 82            |
| 15         | 24            | 76            |
| 21         | 41            | 59            |
| 21.5       | 41            | 59            |
| 22         | 42.2          | 57.8          |
| 23         | 42.5          | 57.5          |
| 27         | 58            | 42            |
| 29         | 59            | 41            |
| 31         | 59.5          | 40.5          |
| 32         | 60            | 40            |
| 48         | 60            | 40            |
| 50         | 10            | 90            |
| 55         | 10            | 90            |
